# Supplementary material for: Antiviral Targeting of Varicella Zoster Virus Replication and Neuronal Reactivation Using CRISPR/Cas9 Cleavage of the Duplicated Open Reading Frames 62/71
Source: MDPI journal article supplement (doi:10.3390/v14020378), 2022-02-12
Supplement: s1 [file s1]

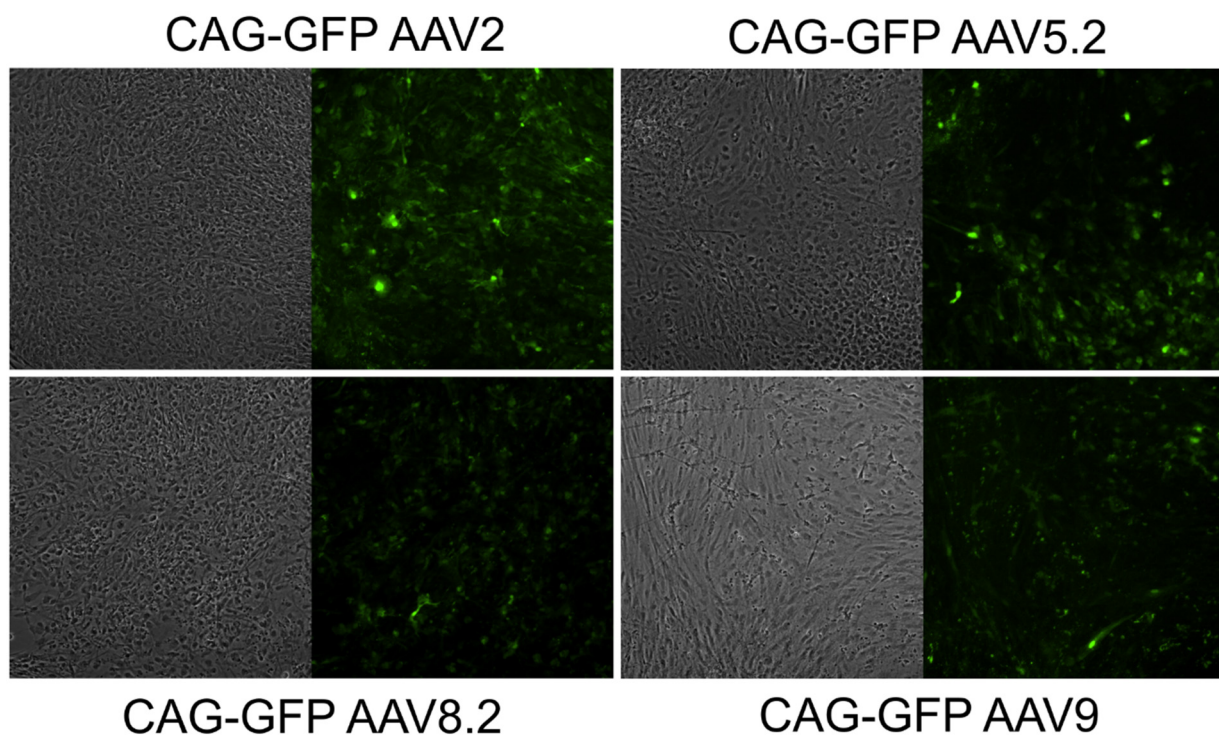

**Figure S1.** Enlarged images from figure 2b to show the GFP expression from different AAV serotypes after transduction into neuron cultures.

| Human neurons                                                                       |                                                                                     | Titrations onto ARPE-19                                                             |                                                                                     | VZV treatment                    | AAV treatment           |
|-------------------------------------------------------------------------------------|-------------------------------------------------------------------------------------|-------------------------------------------------------------------------------------|-------------------------------------------------------------------------------------|----------------------------------|-------------------------|
| 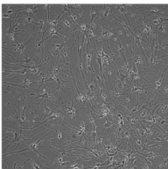   |    |    |    | none                             | none                    |
|    |    |    |    | VZV66GFP no reactivation stimuli | none                    |
|    |    |    |    | none                             | AAV-saCas9<br>(no gRNA) |
|    |    |    |    | none                             | AAV-62-1gR-saCas9       |
|   |   |   |   | VZV66GFP reactivated             | none                    |
|  |  |  |  | VZV66GFP reactivated             | AAV-saCas9              |
|  |  |  |  | VZV66GFP reactivated             | AAV-62-1gR-saCas9       |

**Figure S2.** Enlarged microscopy images from figure 6a, showing that AAV-62-1gR-saCas9 treatment of latently infected neurons reduces VZV progeny and spread following reactivation induction.
